# Supplementary material for: Effect of 1 Year Krill Oil Supplementation on Cognitive Achievement of Dutch Adolescents: A Double-Blind Randomized Controlled Trial
Source: PubMed Central journal article supplement (PMC6628105; doi:10.3390/nu11061230), 2019-05-30
Supplement: nutrients-11-01230-s001.pdf [file nutrients-11-01230-s001.pdf]

**Supplementary Table S1:** Participant characteristics at baseline separate for cohort 1 and 2

|                                           | Placebo      | N  | Krill        | N  | P <sup>4</sup> |
|-------------------------------------------|--------------|----|--------------|----|----------------|
| <b>Cohort 1</b>                           |              |    |              |    |                |
| Age (years)                               | 14.09 ± 0.46 | 69 | 14.18 ± 0.54 | 56 | 0.297          |
| Male/female<br>N (%)                      | 23/46        | 69 | 30/26        | 56 | <b>0.023</b>   |
| Smoking <sup>1</sup> (no/yes)             | 65/3         | 68 | 49/6         | 55 | 0.169          |
| BMI                                       | 20.36 ± 2.96 | 63 | 20.13 ± 2.79 | 46 | 0.671          |
| Alcohol units per week <sup>2</sup>       | 0.29 ± 0.77  | 68 | 0.85 ± 3.09  | 56 | 0.154          |
| Level of parental education<br>(low/high) | 31/32        | 63 | 21/26        | 47 | 0.638          |
| <b>Cohort 2</b>                           |              |    |              |    |                |
| Age (years)                               | 14.04 ± 0.51 | 61 | 14.12 ± 0.49 | 70 | 0.352          |
| Male/female<br>N (%)                      | 28/33        | 61 | 42/28        | 70 | 0.107          |
| Smoking <sup>1</sup> (no/yes)             | 52/9         | 61 | 64/6         | 70 | 0.268          |
| BMI <sup>2</sup>                          | 19.89 ± 3.15 | 60 | 19.65 ± 3.07 | 70 | 0.670          |
| Alcohol units per week <sup>3</sup>       | 0.39 ± 1.48  | 61 | 0.41 ± 1.33  | 70 | 0.917          |
| Level of parental education<br>(low/high) | 23/37        | 60 | 28/40        | 68 | 0.743          |

<sup>1</sup>Smoking was defined as anybody who indicated to smoke more than 0 cigarettes per week; <sup>2</sup> BMI was calculated weight (kg)/ length (m) <sup>3</sup>Alcohol units per week was operationalized as number of days per week that alcohol is consumed times units per consumption moment; <sup>4</sup>ANOVA was used for age, BMI, LPE and alcohol units per week, Chi Square for smoking, and sex. Significant differences (p < 0.05) are noted in bold.

**Supplementary Table S2:** Fatty acids in blood at different time points intention to treat separate for cohort 1 and 2.

| Fatty acid<br>(%wt/wt of<br>total FA) | Baseline                       |                              |       | 3 months                       |                              |        | 6 months                       |                              |        | 12 months                      |                              |        |
|---------------------------------------|--------------------------------|------------------------------|-------|--------------------------------|------------------------------|--------|--------------------------------|------------------------------|--------|--------------------------------|------------------------------|--------|
|                                       | Placebo<br>Mean ± SD<br>(n 69) | Krill<br>Mean ± SD<br>(n 56) | P     | Placebo<br>Mean ± SD<br>(n 64) | Krill<br>Mean ± SD<br>(n 51) | P      | Placebo<br>Mean ± SD<br>(n 60) | Krill<br>Mean ± SD<br>(n 48) | P      | Placebo<br>Mean ± SD<br>(n 57) | Krill<br>Mean ± SD<br>(n 40) | P      |
| Cohort 1                              |                                |                              |       |                                |                              |        |                                |                              |        |                                |                              |        |
| AA 20:4n-6                            | 11.33 ± 1.24                   | 11.01 ± 0.96                 | 0.117 | 11.02 ± 1.16                   | 10.16 ± 0.95                 | <0.001 | 11.10 ± 1.55                   | 9.99 ± 1.30                  | <0.001 | 11.03 ± 1.32                   | 10.17 ± 1.40                 | 0.003  |
| EPA 20:5n-3                           | 0.41 ± 0.21                    | 0.42 ± 0.13                  | 0.701 | 0.45 ± 0.15                    | 0.86 ± 0.35                  | <0.001 | 0.42 ± 0.14                    | 1.06 ± 0.71                  | <0.001 | 0.40 ± 0.13                    | 0.79 ± 0.60                  | <0.001 |
| ObA 22:5n-6                           | 0.41 ± 0.09                    | 0.42 ± 0.08                  | 0.732 | 0.37 ± 0.09                    | 0.27 ± 0.06                  | <0.001 | 0.42 ± 0.09                    | 0.29 ± 0.10                  | <0.001 | 0.34 ± 0.12                    | 0.30 ± 0.13                  | 0.067  |
| DPA 22:5n-3                           | 1.21 ± 0.18                    | 1.22 ± 0.16                  | 0.741 | 1.30 ± 0.19                    | 1.54 ± 0.23                  | <0.001 | 1.30 ± 0.16                    | 1.57 ± 0.36                  | <0.001 | 1.30 ± 0.19                    | 1.50 ± 0.33                  | <0.001 |
| DHA 22:6n-3                           | 2.63 ± 0.40                    | 2.49 ± 0.52                  | 0.088 | 2.72 ± 0.49                    | 3.34 ± 0.64                  | <0.001 | 2.67 ± 0.52                    | 3.48 ± 0.95                  | <0.001 | 2.75 ± 0.54                    | 3.41 ± 0.91                  | <0.001 |
| O3I                                   | 3.90 ± 0.48                    | 3.76 ± 0.61                  | 0.156 | 4.02 ± 0.62                    | 5.12 ± 0.97                  | <0.001 | 3.95 ± 0.61                    | 5.48 ± 1.67                  | <0.001 | 4.01 ± 0.62                    | 5.13 ± 1.53                  | <0.001 |
| Cohort 2                              |                                |                              |       |                                |                              |        |                                |                              |        |                                |                              |        |
|                                       | Placebo<br>Mean ± SD<br>(n 61) | Krill<br>Mean ± SD<br>(n 70) |       | Placebo<br>Mean ± SD<br>(n 60) | Krill<br>Mean ± SD<br>(n 67) | P      | Placebo<br>Mean ± SD<br>(n 56) | Krill<br>Mean ± SD<br>(n 60) | P      | Placebo<br>Mean ± SD<br>(n 47) | Krill<br>Mean ± SD<br>(n 55) | P      |
| AA 20:4n-6                            | 11.03 ± 1.47                   | 11.21 ± 1.33                 | 0.477 | 10.92 ± 1.21                   | 10.34 ± 1.25                 | 0.008  | 10.93 ± 1.42                   | 10.52 ± 1.45                 | 0.132  | 11.30 ± 1.26                   | 11.12 ± 1.43                 | 0.489  |
| EPA 20:5n-3                           | 0.34 ± 0.15                    | 0.35 ± 0.17                  | 0.721 | 0.40 ± 0.14                    | 0.99 ± 0.71                  | <0.001 | 0.40 ± 0.13                    | 0.86 ± 0.67                  | <0.001 | 0.39 ± 0.11                    | 0.72 ± 0.56                  | <0.001 |
| ObA 22:5n-6                           | 0.45 ± 0.12                    | 0.47 ± 0.11                  | 0.245 | 0.46 ± 0.21                    | 0.36 ± 0.14                  | 0.001  | 0.43 ± 0.09                    | 0.34 ± 0.12                  | <0.001 | 0.43 ± 0.09                    | 0.38 ± 0.12                  | 0.034  |
| DPA 22:5n-3                           | 1.23 ± 0.22                    | 1.23 ± 0.19                  | 0.912 | 1.29 ± 0.26                    | 1.61 ± 0.41                  | <0.001 | 1.30 ± 0.23                    | 1.52 ± 0.34                  | <0.001 | 1.30 ± 0.18                    | 1.46 ± 0.30                  | 0.003  |
| DHA 22:6n-3                           | 2.56 ± 0.49                    | 2.49 ± 0.41                  | 0.364 | 2.49 ± 0.52                    | 3.18 ± 0.78                  | <0.001 | 2.71 ± 0.55                    | 3.35 ± 0.87                  | <0.001 | 2.69 ± 0.55                    | 3.05 ± 0.76                  | 0.008  |
| O3I                                   | 3.75 ± 0.60                    | 3.68 ± 0.51                  | 0.499 | 3.74 ± 0.65                    | 5.09 ± 1.49                  | <0.001 | 3.96 ± 0.68                    | 5.13 ± 1.56                  | <0.001 | 3.95 ± 0.64                    | 4.67 ± 1.32                  | 0.001  |

AA = arachidonic acid, DHA = docosahexaenoic acid, DPA= docosapentaenoic acid, EPA = eicosapentaenoic acid, O3I = Omega-3 Index, ObA = Osbond acid

**Supplemental Table S3:** Multilevel analyses of cognitive test scores predicted by condition and Omega-3 Index, participant whom participated in all test moments

|              |                                                    |            | Estimate<br>(SE) | 95%CI                 |     |              |                       | Estimate<br>(SE) | 95%CI |
|--------------|----------------------------------------------------|------------|------------------|-----------------------|-----|--------------|-----------------------|------------------|-------|
| D2- Total    | Test moment                                        | T2         | 45.10 (3.72)     | <b>[37.90; 52.30]</b> | T2  | 47.13 (3.10) | <b>[41.12; 53.14]</b> |                  |       |
|              |                                                    | T3         | 87.65 (3.81)     | <b>[80.28; 95.02]</b> | T3  | 84.45 (3.07) | <b>[78.51; 90.39]</b> |                  |       |
|              | Condition Interaction                              | Krill      | -4.78 (8.85)     | [-21.96; 12.39]       | O3I | -0.12 (1.63) | [-3.28; 3.03]         |                  |       |
|              |                                                    | T2 × krill | 4.24 (5.43)      | [-6.25; 14.73]        |     |              |                       |                  |       |
|              |                                                    | T3 × krill | -7.18 (5.45)     | [-17.71; 3.36]        |     |              |                       |                  |       |
| D2- Correct  | Test moment                                        | T2         | 21.68 (1.61)     | <b>[18.57; 24.79]</b> | T2  | 22.74 (1.35) | <b>[20.13;25.34]</b>  |                  |       |
|              |                                                    | T3         | 42.98 (1.61)     | <b>[39.79; 46.17]</b> | T3  | 41.47 (1.33) | <b>[38.89;44.05]</b>  |                  |       |
|              | Condition <sup>1</sup><br>Interaction <sup>2</sup> | Krill      | 0.30 (4.11)      | [-7.67; 8.28]         | O3I | -0.52 (0.71) | [-1.90;0.86]          |                  |       |
|              |                                                    | T2 × krill | 1.31 (2.34)      | [-3.23; 5.84]         |     |              |                       |                  |       |
|              |                                                    | T3 × krill | -4.01 (2.36)     | [-8.57; 0.54]         |     |              |                       |                  |       |
| D2- F1       | Test moment                                        | T2         | -0.16 (0.04)     | <b>[-0.25; -0.07]</b> | T2  | -0.16 (0.04) | <b>[-0.23; -0.08]</b> |                  |       |
|              |                                                    | T3         | -0.25 (0.05)     | <b>[-0.34; -0.16]</b> | T3  | -0.27 (0.04) | <b>[-0.34; -0.20]</b> |                  |       |
|              | Condition Interaction                              | Krill      | -0.15 (0.11)     | [-0.37; 0.07]         | O3I | 0.02 (0.02)  | [-0.02; 0.06]         |                  |       |
|              |                                                    | T2 × krill | 0.04 (0.07)      | [-0.10; 0.17]         |     |              |                       |                  |       |
|              |                                                    | T3 × krill | -0.03 (0.07)     | [-0.16; 0.11]         |     |              |                       |                  |       |
| D2-F2        | Test moment                                        | T2         | -0.14 (0.13)     | [-0.39; 0.12]         | T2  | -0.03 (0.11) | [-0.23; 0.18]         |                  |       |
|              |                                                    | T3         | -0.46 (0.15)     | <b>[-0.73; -0.18]</b> | T3  | -0.48 (0.13) | <b>[-0.76; -0.26]</b> |                  |       |
|              | Condition Interaction                              | Krill      | -0.24 (0.18)     | [-0.59; 0.11]         | O3I | -0.04 (0.05) | [-0.14; 0.06]         |                  |       |
|              |                                                    | T2 × krill | 0.19 (0.21)      | [-0.21; 0.58]         |     |              |                       |                  |       |
|              |                                                    | T3 × krill | -0.03 (0.23)     | [-0.52; 0.41]         |     |              |                       |                  |       |
| LDST         | Test moment                                        | T2         | 2.27 (0.50)      | <b>[1.30; 3.24]</b>   | T2  | 2.43 (0.41)  | [1.64; 3.22]          |                  |       |
|              |                                                    | T3         | 4.64 (0.51)      | <b>[3.65; 5.63]</b>   | T3  | 4.58 (0.40)  | [3.80; 5.36]          |                  |       |
|              | Condition Interaction                              | Krill      | -0.61 (0.87)     | [-2.29; 1.07]         | O3I | -0.07 (0.20) | [-0.47; 0.33]         |                  |       |
|              |                                                    | T2 × krill | 0.20 (0.73)      | [-1.22; 1.62]         |     |              |                       |                  |       |
|              |                                                    | T3 × krill | -0.06 (0.73)     | [-1.48; 1.36]         |     |              |                       |                  |       |
| Shifting     | Test moment                                        | T2         | -1.72 (0.86)     | <b>[-3.38; -0.06]</b> | T2  | -1.90 (0.68) | <b>[-3.22; -0.59]</b> |                  |       |
|              |                                                    | T3         | - 1.29 (0.87)    | [-2.97; 0.40]         | T3  | -1.95 (0.68) | <b>[-3.26; -0.64]</b> |                  |       |
|              | Condition Interaction                              | Krill      | -0.10 (0.98)     | [-1.99; 1.80]         | O3I | 0.15 (0.28)  | [-0.39; 0.68]         |                  |       |
|              |                                                    | T2 × krill | -0.11(1.26)      | [-2.54; 2.32]         |     |              |                       |                  |       |
|              |                                                    | T3 × krill | -1.40 (1.26)     | [-3.85; 1.04]         |     |              |                       |                  |       |
| Interference | Test moment                                        | T2         | -3.82 (0.76)     | <b>[-5.29; -2.35]</b> | T2  | -3.39 (0.61) | <b>[-4.58; -2.21]</b> |                  |       |
|              |                                                    | T3         | -5.25 (0.77)     | <b>[-6.75; -3.76]</b> | T3  | -5.38 (0.61) | <b>[-6.55; -4.20]</b> |                  |       |
|              | Condition Interaction                              | Krill      | -0.40 (1.05)     | [-2.44; 1.65]         | O3I | -0.01 (0.29) | [-0.57; 0.54]         |                  |       |
|              |                                                    | T2 × krill | 0.87 (1.11)      | [-1.28; 3.02]         |     |              |                       |                  |       |
|              |                                                    | T3 × krill | -0.45 (1.11)     | [-2.60; 1.70]         |     |              |                       |                  |       |

D2 = D2 test of attention, D2 correct = number of target stimuli processed, D2F1 = errors of omission on D2, D2F2 = errors of commission on D2, LDST = letter digit substitution task, O3I = Omega-3 Index, T2 = test moment 6 months, T3 = test moment 12 months. All models included test moment, condition (krill/placebo) plus covariates (alcohol consumption, smoking behaviour, age at baseline, puberty status at baseline, BMI, highest level of parental education, sex, cohort number and diagnosis). The factor krill indicates the score of somebody in the krill oil group compared to the placebo group. Significant 95 % CI are printed in bold. The model with condition also includes the time moment X condition interaction factor. Note that a lower score on D2F1, D2F2, Shifting and Interference is a better performance.

**Supplementary Table S4:** Multilevel analyses of cognitive test scores predicted by condition (intention to treat) and according to Omega-3 Index for cohort 1

| Cohort 1     |             |            | Estimate<br>(SE) | 95%CI                  | Estimate (SE)   | 95%CI        |                       |               |
|--------------|-------------|------------|------------------|------------------------|-----------------|--------------|-----------------------|---------------|
| D2- Total    | Test moment | T2         | 45.69 (4.93)     | <b>[36.28; 55.10]</b>  | T2              | 45.08 (4.32) | <b>[36.80; 53.35]</b> |               |
|              |             | T3         | 90.33 (5.11)     | <b>[80.56; 100.09]</b> | T3              | 85.33 (4.39) | <b>[76.92; 93.74]</b> |               |
|              | Interaction | Condition  | Krill            | 0.68 (12.23)           | [-22.84; 24.19] | O3I          | -1.42 (2.34)          | [-5.90; 3.06] |
|              |             | T2 × krill | -3.06 (7.91)     | [-18.18; 12.06]        |                 |              |                       |               |
|              |             | T3 × krill | -15.34 (8.08)    | [-30.77; 0.09]         |                 |              |                       |               |
| D2- Correct  | Test moment | T2         | 22.05 (2.22)     | <b>[17.82; 26.29]</b>  | T2              | 22.24 (1.94) | <b>[18.53; 25.96]</b> |               |
|              |             | T3         | 43.78 (2.30)     | <b>[39.39; 48.18]</b>  | T3              | 41.99 (1.97) | <b>[38.22; 45.77]</b> |               |
|              | Interaction | Condition  | Krill            | -0.75 (5.61)           | [-11.53; 10.03] | O3I          | -1.05 (1.05)          | [-3.06; 0.96] |
|              |             | T2 × krill | -0.77 (3.56)     | [-7.57; 6.03]          |                 |              |                       |               |
|              |             | T3 × krill | -6.42 (3.64)     | [-13.36; 0.53]         |                 |              |                       |               |
| D2- F1       | Test moment | T2         | -0.18 (0.06)     | <b>[-0.31; -0.04]</b>  | T2              | -0.21 (0.06) | <b>[-0.31; -0.10]</b> |               |
|              |             | T3         | -0.29 (0.07)     | <b>[-0.41; -0.14]</b>  | T3              | -0.35 (0.06) | <b>[-0.47; -0.24]</b> |               |
|              | Interaction | Condition  | Krill            | -0.12 (0.16)           | [-0.19; 0.44]   | O3I          | -0.02 (0.03)          | [-0.09; 0.03] |
|              |             | T2 × krill | -0.07 (0.10)     | [-0.28; 0.14]          |                 |              |                       |               |
|              |             | T3 × krill | -0.15 (0.11)     | [-0.37; 0.04]          |                 |              |                       |               |
| D2-F2        | Test moment | T2         | -0.01 (0.17)     | [-0.37; 0.34]          | T2              | -0.12 (0.15) | [-0.38; 0.20]         |               |
|              |             | T3         | -0.24 (0.19)     | [-0.63; 0.16]          | T3              | -0.37 (0.17) | <b>[-0.67; -0.05]</b> |               |
|              | Interaction | Condition  | Krill            | -0.04 (0.26)           | [-0.53; 0.49]   | O3I          | -0.004 (0.08)         | [-0.16; 0.14] |
|              |             | T2 × krill | -0.35 (0.30)     | [-0.93; 0.23]          |                 |              |                       |               |
|              |             | T3 × krill | -0.27 (0.33)     | [-0.96; 0.30]          |                 |              |                       |               |
| LDST         | Test moment | T2         | 3.13 (0.70)      | <b>[1.78; 4.48]</b>    | T2              | 2.89 (0.61)  | <b>[1.73; 4.05]</b>   |               |
|              |             | T3         | 4.22 (0.73)      | <b>[2.83; 5.61]</b>    | T3              | 4.40 (0.61)  | <b>[3.23; 5.58]</b>   |               |
|              | Interaction | Condition  | Krill            | -0.22 (1.29)           | [-2.70; 2.25]   | O3I          | -0.004 (0.31)         | [-0.61; 0.60] |
|              |             | T2 × krill | -0.61 (1.13)     | [-2.77; 1.55]          |                 |              |                       |               |
|              |             | T3 × krill | 0.79 (1.15)      | [-1.42; 2.99]          |                 |              |                       |               |
| Shifting     | Test moment | T2         | -1.66 (1.21)     | [-3.98; 0.66]          | T2              | -2.09 (1.01) | <b>[-4.02; -0.16]</b> |               |
|              |             | T3         | -1.94 (1.23)     | [-4.31; 0.42]          | T3              | -2.27 (1.02) | <b>[-4.23; -0.30]</b> |               |
|              | Interaction | Condition  | Krill            | -0.83 (1.40)           | [-3.53; 1.87]   | O3I          | 0.23 (0.41)           | [-0.57; 1.02] |
|              |             | T2 × krill | -0.69 (1.95)     | [-4.43; 3.05]          |                 |              |                       |               |
|              |             | T3 × krill | -1.05 (1.98)     | [-4.85; 2.74]          |                 |              |                       |               |
| Interference | Test moment | T2         | -4.12 (1.11)     | <b>[-6.25; -1.99]</b>  | T2              | -3.79 (0.95) | <b>[-5.57; -1.95]</b> |               |
|              |             | T3         | -5.15 (1.14)     | <b>[-7.33; -2.96]</b>  | T3              | -5.08 (0.96) | <b>[-6.91; -3.24]</b> |               |
|              | Interaction | Condition  | Krill            | -1.01 (1.67)           | [-4.21; 2.19]   | O3I          | 0.16 (0.46)           | [-0.72; 1.05] |
|              |             | T2 × krill | 1.22 (1.79)      | [-2.20; 4.63]          |                 |              |                       |               |
|              |             | T3 × krill | -0.03 (1.82)     | [-3.51; 3.45]          |                 |              |                       |               |

D2 = D2 test of attention, D2 correct = number of target stimuli processed, D2F1 = errors of omission on D2, D2F2 = errors of commission on D2, LDST = letter digit substitution task, O3I = Omega-3 Index, T2 = test moment 6 months, T3 = test moment 12 months. All models included test moment, condition (krill/placebo) plus covariates (alcohol consumption, smoking behaviour, age at baseline, puberty status at baseline, BMI, highest level of parental education, sex, cohort number and diagnosis). Significant 95 % CI are printed in bold. The model with condition also includes the time moment X condition interaction factor. Note that a lower score on D2F1, D2F2, Shifting and Interference is a better performance.

**Supplementary Table S5:** Multilevel analyses of cognitive test scores predicted by condition (intention to treat) and according to Omega-3 Index for cohort 2

| Cohort 2     |             |            | Estimate (SE) | 95%CI                  |                       | Estimate (SE) | 95%CI                  |               |
|--------------|-------------|------------|---------------|------------------------|-----------------------|---------------|------------------------|---------------|
| D2- Total    | Test moment | T2         | 52.93 (5.32)  | <b>[42.71; 63.16]</b>  | T2                    | 51.36 (4.22)  | <b>[43.22; 59.50]</b>  |               |
|              |             | T3         | 89.45 (5.78)  | <b>[78.33; 100.57]</b> | T3                    | 85.88 (4.32)  | <b>[77.54; 94.22]</b>  |               |
|              | Interaction | Condition  | Krill         | -10.97 (10.65)         | [-31.54; 9.61]        | O3I           | 0.43 (2.26)            | [-3.93; 4.80] |
|              |             | T2 × krill | -2.15 (7.26)  | [-16.10; 11.80]        |                       |               |                        |               |
|              |             | T3 × krill | -6.30 (7.68)  | [-21.07; 8.48]         |                       |               |                        |               |
| D2- Correct  | Test moment | T2         | 24.57 (2.22)  | <b>[20.30; 28.84]</b>  | T2                    | 23.99 (1.77)  | <b>[20.57; 27.41]</b>  |               |
|              |             | T3         | 43.90 (2.42)  | <b>[39.25; 48.55]</b>  | T3                    | 41.79 (1.82)  | <b>[38.28; 45.29]</b>  |               |
|              | Interaction | Condition  | Krill         | -1.07 (4.91)           | [-10.56; 8.42]        | O3I           | -0.15 (0.96)           | [-2.00; 1.71] |
|              |             | T2 × krill | -1.35 (3.03)  | [-7.18; 4.48]          |                       |               |                        |               |
|              |             | T3 × krill | -4.04 (3.21)  | [-10.21; 2.14]         |                       |               |                        |               |
| D2- F1       | Test moment | T2         | -0.08 (0.06)  | [-0.19; 0.04]          | T2                    | -0.10 (0.05)  | <b>[-0.20; -0.004]</b> |               |
|              |             | T3         | -0.19 (0.06)  | <b>[-0.31; -0.06]</b>  | T3                    | -0.20 (0.05)  | <b>[-0.31; -0.11]</b>  |               |
|              | Interaction | Condition  | Krill         | -0.26 (0.13)           | [-0.56; 0.008]        | O3I           | 0.03 (0.03)            | [-0.03; 0.08] |
|              |             | T2 × krill | 0.02 (0.08)   | [-0.15; 0.17]          |                       |               |                        |               |
|              |             | T3 × krill | -0.01 (0.09)  | [-0.20; 0.14]          |                       |               |                        |               |
| D2-F2        | Test moment | T2         | -0.48 (0.19)  | <b>[-0.83; -0.14]</b>  | T2                    | -0.10 (0.14)  | [-0.39; 0.14]          |               |
|              |             | T3         | -0.95 (0.24)  | <b>[-1.44; -0.49]</b>  | T3                    | -0.71 (0.17)  | <b>[-1.07; -0.38]</b>  |               |
|              | Interaction | Condition  | Krill         | -0.41 (0.19)           | <b>[-0.79; -0.05]</b> | O3I           | -0.08 (0.07)           | [-0.24; 0.04] |
|              |             | T2 × krill | 0.58 (0.26)   | <b>[0.09; 1.06]</b>    |                       |               |                        |               |
|              |             | T3 × krill | 0.34 (0.33)   | [-0.34; 0.96]          |                       |               |                        |               |
| LDST         | Test moment | T2         | 1.81 (0.67)   | <b>[0.53; 3.09]</b>    | T2                    | 2.11 (0.52)   | <b>[1.11; 3.12]</b>    |               |
|              |             | T3         | 5.42 (0.72)   | <b>[4.03; 6.81]</b>    | T3                    | 4.79 (0.54)   | <b>[3.76; 5.82]</b>    |               |
|              | Interaction | Condition  | Krill         | 0.05 (1.02)            | [-1.91; 2.02]         | O3I           | -0.12 (0.27)           | [-0.63; 0.40] |
|              |             | T2 × krill | 0.37 (0.91)   | [-1.38; 2.12]          |                       |               |                        |               |
|              |             | T3 × krill | -1.16 (0.96)  | [-3.00; 0.69]          |                       |               |                        |               |
| Shifting     | Test moment | T2         | -1.63 (1.11)  | [-3.77; 0.51]          | T2                    | -1.59 (0.83)  | [-3.21; 0.02]          |               |
|              |             | T3         | -0.59 (1.20)  | [-2.89; 1.71]          | T3                    | -1.57 (0.86)  | [-3.24; 0.10]          |               |
|              | Interaction | Condition  | Krill         | 0.30 (1.19)            | [-2.00; 2.60]         | O3I           | -0.009 (0.36)          | [-0.71; 0.69] |
|              |             | T2 × krill | 0.02 (1.51)   | [-2.90; 2.93]          |                       |               |                        |               |
|              |             | T3 × krill | -1.86 (1.59)  | [-4.93; 1.21]          |                       |               |                        |               |
| Interference | Test moment | T2         | -3.89 (0.94)  | <b>[-5.70 -2.07]</b>   | T2                    | -3.09 (0.72)  | <b>[-4.49; -1.69]</b>  |               |
|              |             | T3         | -5.68 (1.02)  | <b>[-7.64; -3.72]</b>  | T3                    | -5.45 (0.74)  | <b>[-6.89; -4.02]</b>  |               |
|              | Interaction | Condition  | Krill         | -1.62 (1.18)           | [-3.90; 0.66]         | O3I           | -0.17 (0.35)           | [-0.84; 0.50] |
|              |             | T2 × krill | 1.15 (1.29)   | [-1.34; 3.63]          |                       |               |                        |               |
|              |             | T3 × krill | 0.16 (1.35)   | [-2.45; 2.76]          |                       |               |                        |               |

D2 = D2 test of attention, D2 correct = number of target stimuli processed, D2F1 = errors of omission on D2, D2F2 = errors of commission on D2, LDST = letter digit substitution task, O3I = Omega-3 Index, T2 = test moment 6 months, T3 = test moment 12 months. All models included test moment, condition (krill/placebo) plus covariates (alcohol consumption, smoking behaviour, age at baseline, puberty status at baseline, BMI, highest level of parental education, sex, cohort number and diagnosis). Significant 95 % CI are printed in bold. The model with condition also includes the time moment X condition interaction factor. Note that a lower score on D2F1, D2F2, Shifting and Interference is a better performance.

**Supplemental Table S6:** Multilevel analyses of DSF and DSB predicted by condition and Omega-3 Index, participant whom participated in all test moments

|                            |            | Odds ratio<br>(SE) | 95%CI               |     |             | Odds ratio<br>(SE)  | 95%CI |
|----------------------------|------------|--------------------|---------------------|-----|-------------|---------------------|-------|
| <b>Digit Span forward</b>  |            |                    |                     |     |             |                     |       |
| Test moment                | T2         | 0.51 (1.34)        | <b>[0.29; 0.90]</b> | T2  | 0.58 (1.26) | <b>[0.37; 0.92]</b> |       |
|                            | T3         | 1.28 (1.34)        | [0.72; 2.27]        | T3  | 1.25 (1.26) | [0.80; 1.96]        |       |
| Condition                  | Krill      | 1.03 (1.46)        | [0.49; 2.17]        | O3I | 1.03 (1.11) | [0.84; 1.27]        |       |
| Interaction                | T2 × krill | 1.46 (1.53)        | [0.64; 3.37]        |     |             |                     |       |
|                            | T3 × krill | 1.06 (1.53)        | [0.46; 2.44]        |     |             |                     |       |
| <b>Digit Span backward</b> |            |                    |                     |     |             |                     |       |
| Test moment                | T2         | 1.31 (1.32)        | [0.76; 2.24]        | T2  | 1.44 (1.24) | [0.94; 2.21]        |       |
|                            | T3         | 1.53 (1.33)        | [0.87; 2.69]        | T3  | 1.58 (1.25) | <b>[1.02; 2.43]</b> |       |
| Condition                  | Krill      | 0.81 (1.41)        | [0.41; 1.59]        | O3I | 0.99 (1.10) | [0.82; 1.20]        |       |
| Interaction                | T2 × krill | 1.15 (1.49)        | [0.52; 2.51]        |     |             |                     |       |
|                            | T3 × krill | 1.02 (1.51)        | [0.46; 2.29]        |     |             |                     |       |

O3I = Omega-3 Index, T2 = test moment 6 months, T3 = test moment 12 months. All models included test moment, condition (krill/placebo) or Omega-3 Index plus covariates (alcohol consumption, smoking behaviour, age at baseline, puberty status at baseline, BMI, highest level of parental education, sex, cohort number and diagnosis). The model with condition also includes the time moment X condition interaction factor. Please note that for odds ratios significance is indicated by a 95% CI which does not contain 1.

**Supplementary Table S7:** Multilevel analyses of digit span forward and digit span backward, predicted by either condition (intention to treat) or Omega-3 Index for Cohort 1

| Cohort 1                   |            | Odds ratio (SE) | 95%CI               |     | Odds ratio (SE) | 95%CI               |
|----------------------------|------------|-----------------|---------------------|-----|-----------------|---------------------|
| <b>Digit Span forward</b>  |            |                 |                     |     |                 |                     |
| Test moment                | T2         | 0.41 (1.48)     | <b>[0.19; 0.89]</b> | T2  | 0.47 (1.39)     | <b>[0.25; 0.91]</b> |
|                            | T3         | 1.31 (1.49)     | [0.60; 2.89]        | T3  | 0.85 (1.40)     | [0.44; 1.64]        |
| Condition                  | Krill      | 1.52 (1.77)     | [0.49; 4.65]        | O3I | 0.95 (1.18)     | [0.69; 1.30]        |
| Interaction                | T2 × krill | 1.49 (1.86)     | [0.44; 5.02]        |     |                 |                     |
|                            | T3 × krill | 0.36 (1.92)     | [0.10; 1.30]        |     |                 |                     |
| <b>Digit Span backward</b> |            |                 |                     |     |                 |                     |
| Test moment                | T2         | 1.33 (1.44)     | [0.65; 2.72]        | T2  | 1.04 (1.35)     | [0.57; 1.89]        |
|                            | T3         | 1.21 (1.47)     | [0.57; 2.55]        | T3  | 1.28 (1.37)     | [0.69; 2.38]        |
| Condition                  | Krill      | 0.92 (1.65)     | [0.35; 2.44]        | O3I | 1.04 (1.15)     | [0.79; 1.38]        |
| Interaction                | T2 × krill | 0.61 (1.79)     | [0.20; 1.92]        |     |                 |                     |
|                            | T3 × krill | 1.13 (1.84)     | [0.34; 3.73]        |     |                 |                     |

O3I = Omega-3 Index, T2 = test moment 6 months, T3 = test moment 12 months. All models included test moment, condition (krill/placebo) or Omega-3 Index plus covariates (alcohol consumption, smoking behaviour, age at baseline, puberty status at baseline, BMI, highest level of parental education, sex, cohort number and diagnosis). The model with condition also includes the time moment X condition interaction factor. Please note that for odds ratios significance is indicated by a 95% CI which does not contain 1.

**Supplementary Table S8:** Multilevel analyses of digit span forward and digit span backward, predicted by either condition (intention to treat) or Omega-3 Index for Cohort 2

| Cohort 2              |            | Odds ratio (SE) | 95%CI               | Odds ratio (SE) | 95%CI                           |
|-----------------------|------------|-----------------|---------------------|-----------------|---------------------------------|
| Digit Span forward    |            |                 |                     |                 |                                 |
| Test moment           | T2         | 0.47 (1.49)     | [0.22; 1.03]        | T2              | 0.60 (1.35) [0.33;1.09]         |
|                       | T3         | 1.10 (1.52)     | [0.49; 2.49]        | T3              | 1.56 (1.35) [0.87; 2.82]        |
| Condition Interaction | Krill      | 0.70 (1.55)     | [0.30; 1.65]        | O3I             | 1.15 (1.14) [0.88; 1.50]        |
|                       | T2 × krill | 2.05 (1.73)     | [0.70; 6.00]        |                 |                                 |
|                       | T3 × krill | 2.24 (1.75)     | [0.75; 6.68]        |                 |                                 |
| Digit Span backward   |            |                 |                     |                 |                                 |
| Test moment           | T2         | 1.45 (1.46)     | [0.69; 3.02]        | T2              | 2.15 (1.33) <b>[1.24; 3.75]</b> |
|                       | T3         | 2.32 (1.51)     | <b>[1.03; 5.21]</b> | T3              | 2.12 (1.35) <b>[1.18; 3.81]</b> |
| Condition Interaction | Krill      | 0.87 (1.51)     | [0.39; 1.96]        | O3I             | 0.91 (1.14) [0.71; 1.17]        |
|                       | T2 × krill | 1.66 (1.66)     | [0.61; 4.50]        |                 |                                 |
|                       | T3 × krill | 0.76 (1.73)     | [0.26; 2.23]        |                 |                                 |

O3I = Omega-3 Index, T2 = test moment 6 months, T3 = test moment 12 months. All models included test moment, condition (krill/placebo) or Omega-3 Index plus covariates (alcohol consumption, smoking behaviour, age at baseline, puberty status at baseline, BMI, highest level of parental education, sex, cohort number and diagnosis). The model with condition also includes the time moment X condition interaction factor. Please note that for odds ratios significance is indicated by a 95% CI which does not contain 1.
